# Supplementary material for: Synthesis and Ring-Opening Metathesis Polymerization of a New Norbornene Dicarboximide with a Pendant Carbazole Moiety
Source: Hindawi journal article supplement (doi:10.1155/2019/5306912), 2019-04-24
Supplement: f1 [file 5306912.f1.doc]

**Synthesis and Ring-Opening Metathesis Polymerization of a New Norbornene Dicarboximide with a Pendant Carbazole Moiety**

Stefania Pragliola,1 Antonio Botta,1 Rubina Troiano,1 Veronica Paradiso,1 and Fabia Grisi1*

*1Dipartimento di Chimica e Biologia “Adolfo Zambelli”, Università di Salerno,*

*Via Giovanni Paolo II 132, I-84084 Fisciano, Salerno, Italy.*

**Index**

**Figure S1:** 1H NMR of 2-(4-((9H-carbazole-9-yl)methyl)

benzyl)-3a,4,7,7a-tetrahydro-1H-4,7-methanoisoindole-1,3(2H)-dione (**M**) **p. 3**

**Figure S2:** 13C NMR of 2-(4-((9H-carbazole-9-yl)methyl)

benzyl)-3a,4,7,7a-tetrahydro-1H-4,7-methanoisoindole-1,3(2H)-dione (**M**) **p. 3**

**Figure S3:** ESI-MS of 2-(4-((9H-carbazole-9-yl)methyl)

benzyl)-3a,4,7,7a-tetrahydro-1H-4,7-methanoisoindole-1,3(2H)-dione (**M**) **p. 4**

**Figure S4:** DSC thermogram trace of 2-(4-((9H-carbazole-9-yl)

methyl)benzyl)-3a,4,7,7a-tetrahydro-1H-4,7-methanoisoindole-1,3(2H)-dione (**M**) **p. 5**

**Figure S5:** FT-IR spectrum of 2-(4-((9H-carbazole-9-yl)methyl)

benzyl)-3a,4,7,7a-tetrahydro-1H-4,7-methanoisoindole-1,3(2H)-dione (**M**) **p. 5**

**Figure S6:** UV-vis absorption spectrum of 2-(4-((9H-carbazole-9-yl)

methyl)benzyl)-3a,4,7,7a-tetrahydro-1H-4,7-methaneisoindole-1,3(2H)-dione (**M**) **p. 6**

**Figure S7:** Fluorescence spectrum of 2-(4-((9H-carbazole-9-yl)

methyl)benzyl)-3a,4,7,7a-tetrahydro-1H-4,7-methanoisoindole-1,3(2H)-dione (**M**) **p. 6**

**Figure S8:** 1H NMR of poly (2-(4-((9H-carbazole-9-yl)methyl)

benzyl)-3a,4,7,7a-tetrahydro-1H-4,7-methanoisoindole-1,3(2H)-dione) **p. 7**

**Figure S9:** 13C NMR of poly (2-(4-((9H-carbazole-9-yl)methyl)

benzyl)-3a,4,7,7a-tetrahydro-1H-4,7-methanoisoindole-1,3(2H)-dione) **p. 7**

**Figure S10:** FT-IR spectrum of polymer sample **2 p. 8**

**Figure S11.** GPC trace of polymer sample **1 p. 8**


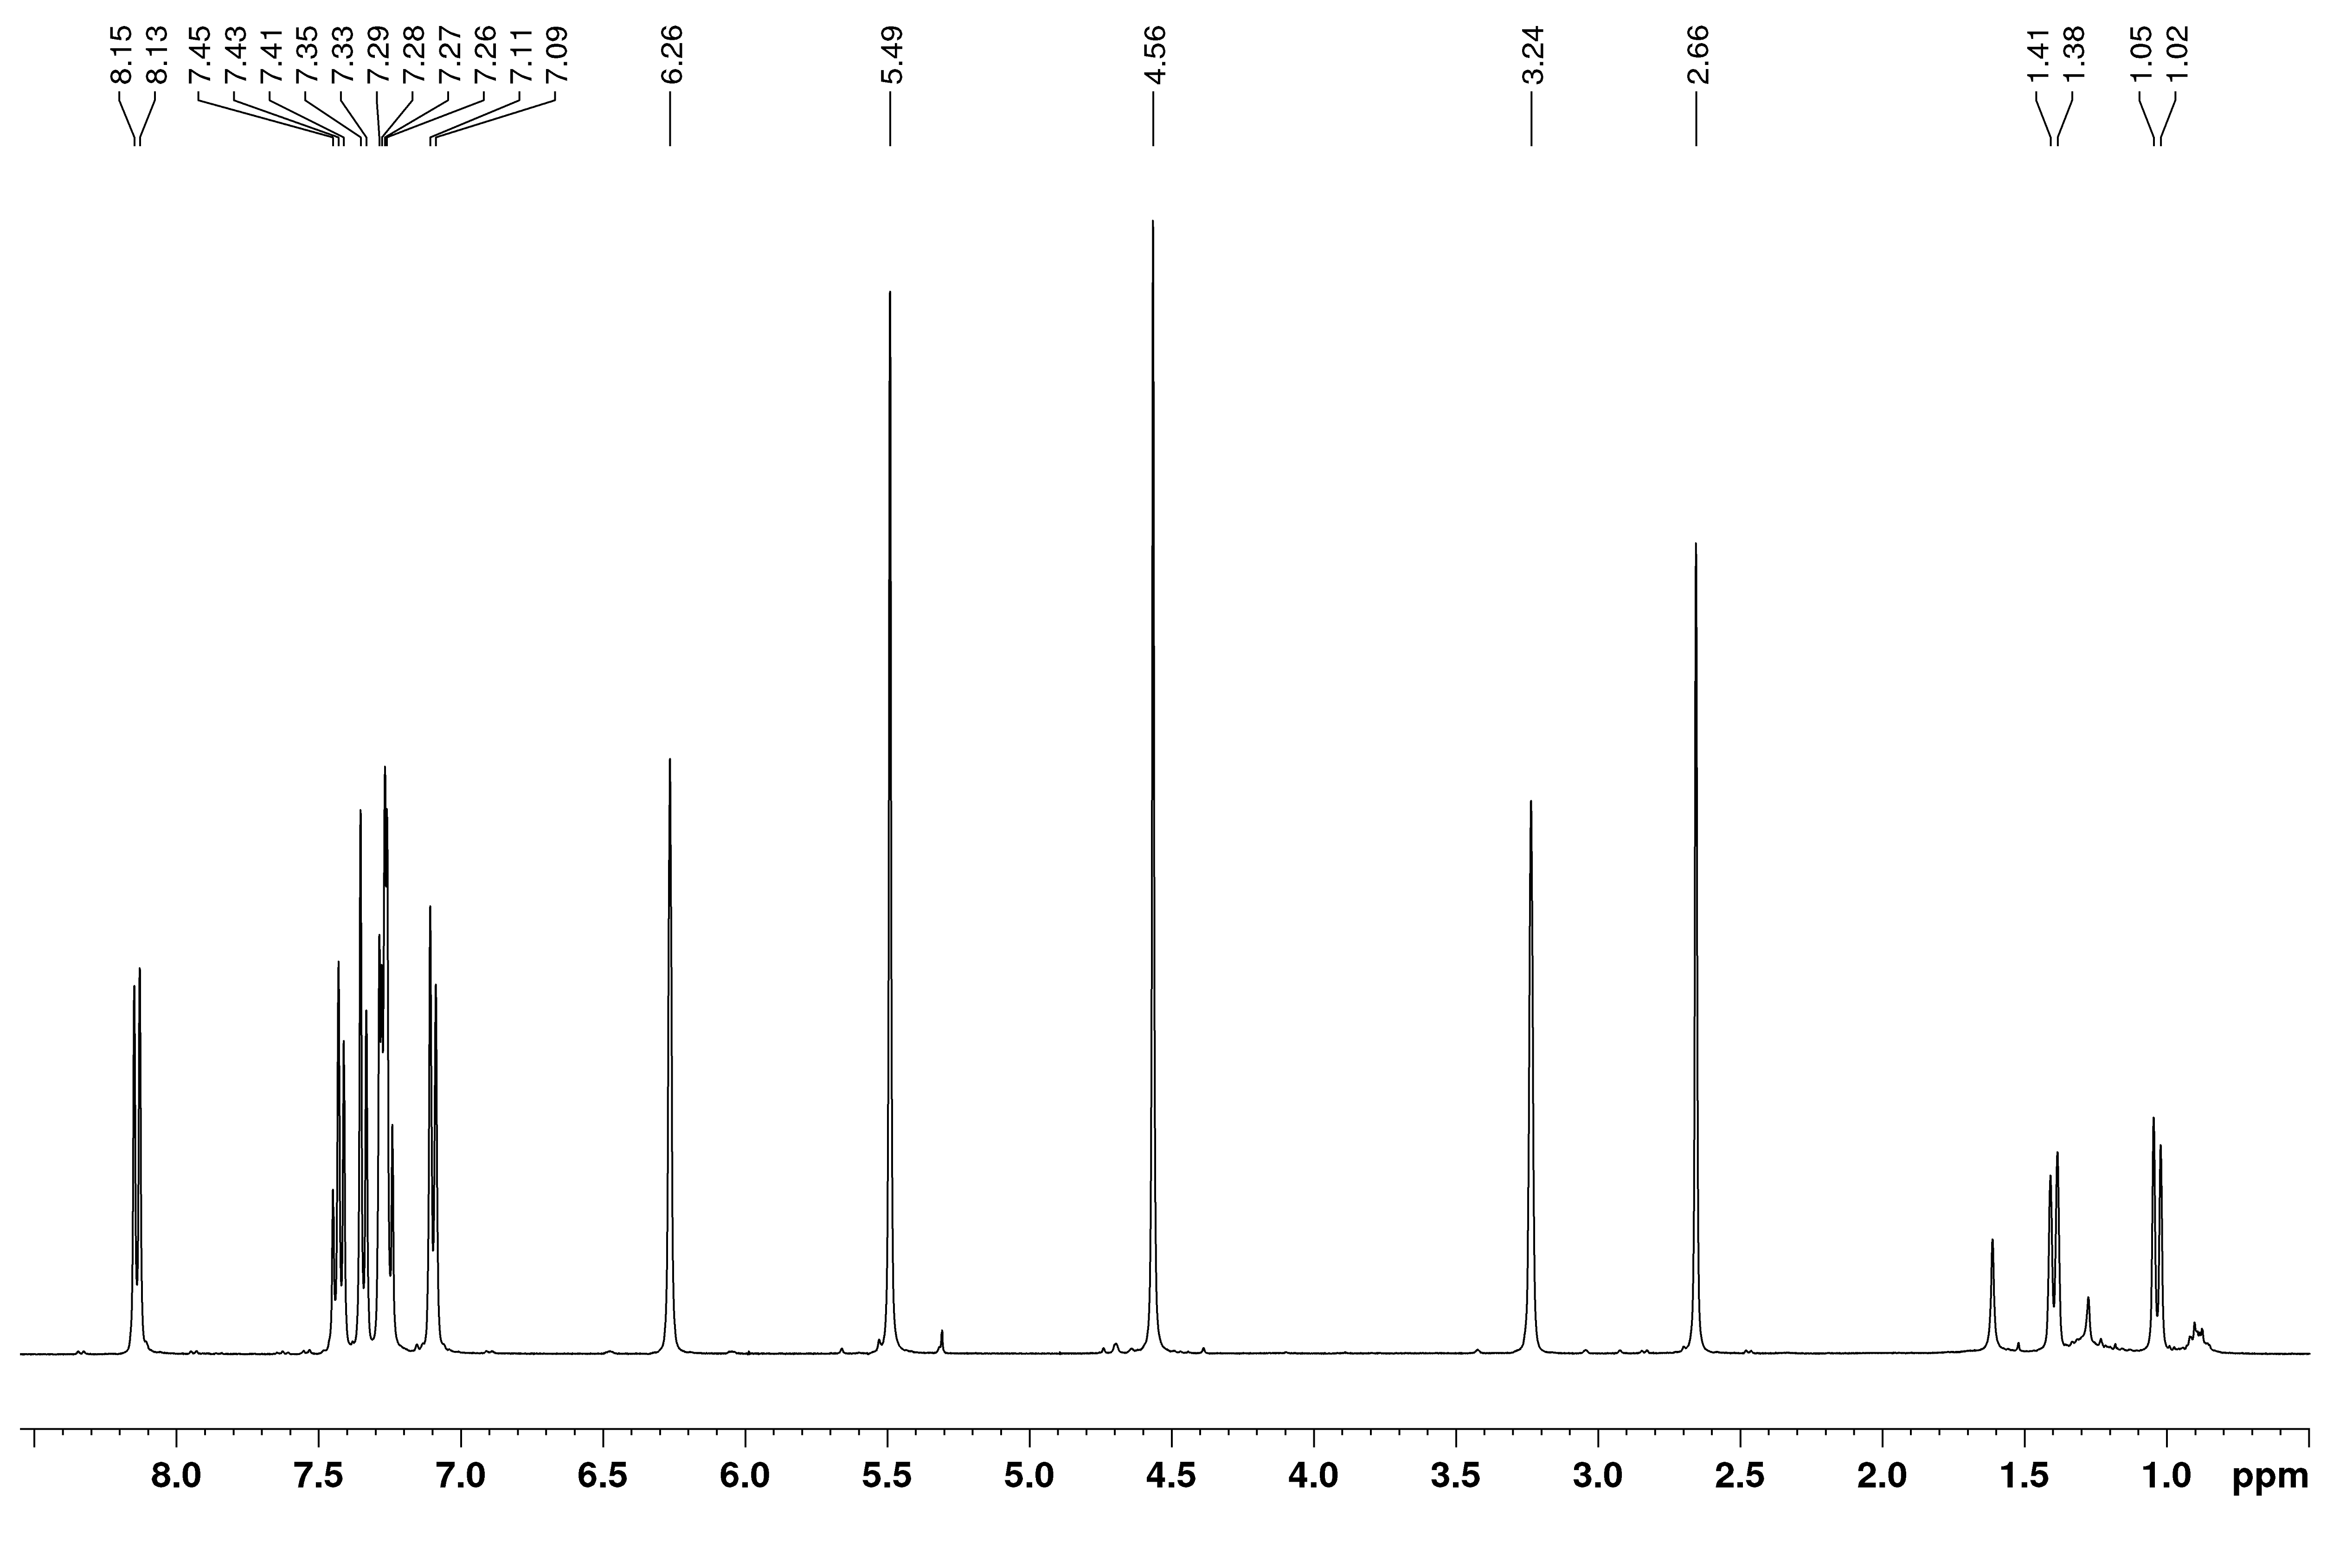


**Figure S1:** 1H NMR of 2-(4-((9H-carbazole-9-yl)methyl)benzyl)-3a,4,7,7a-tetrahydro-1H-4,7-methanoisoindole-1,3(2H)-dione (**M**). (Solvent: CDCl3, TMS scale)


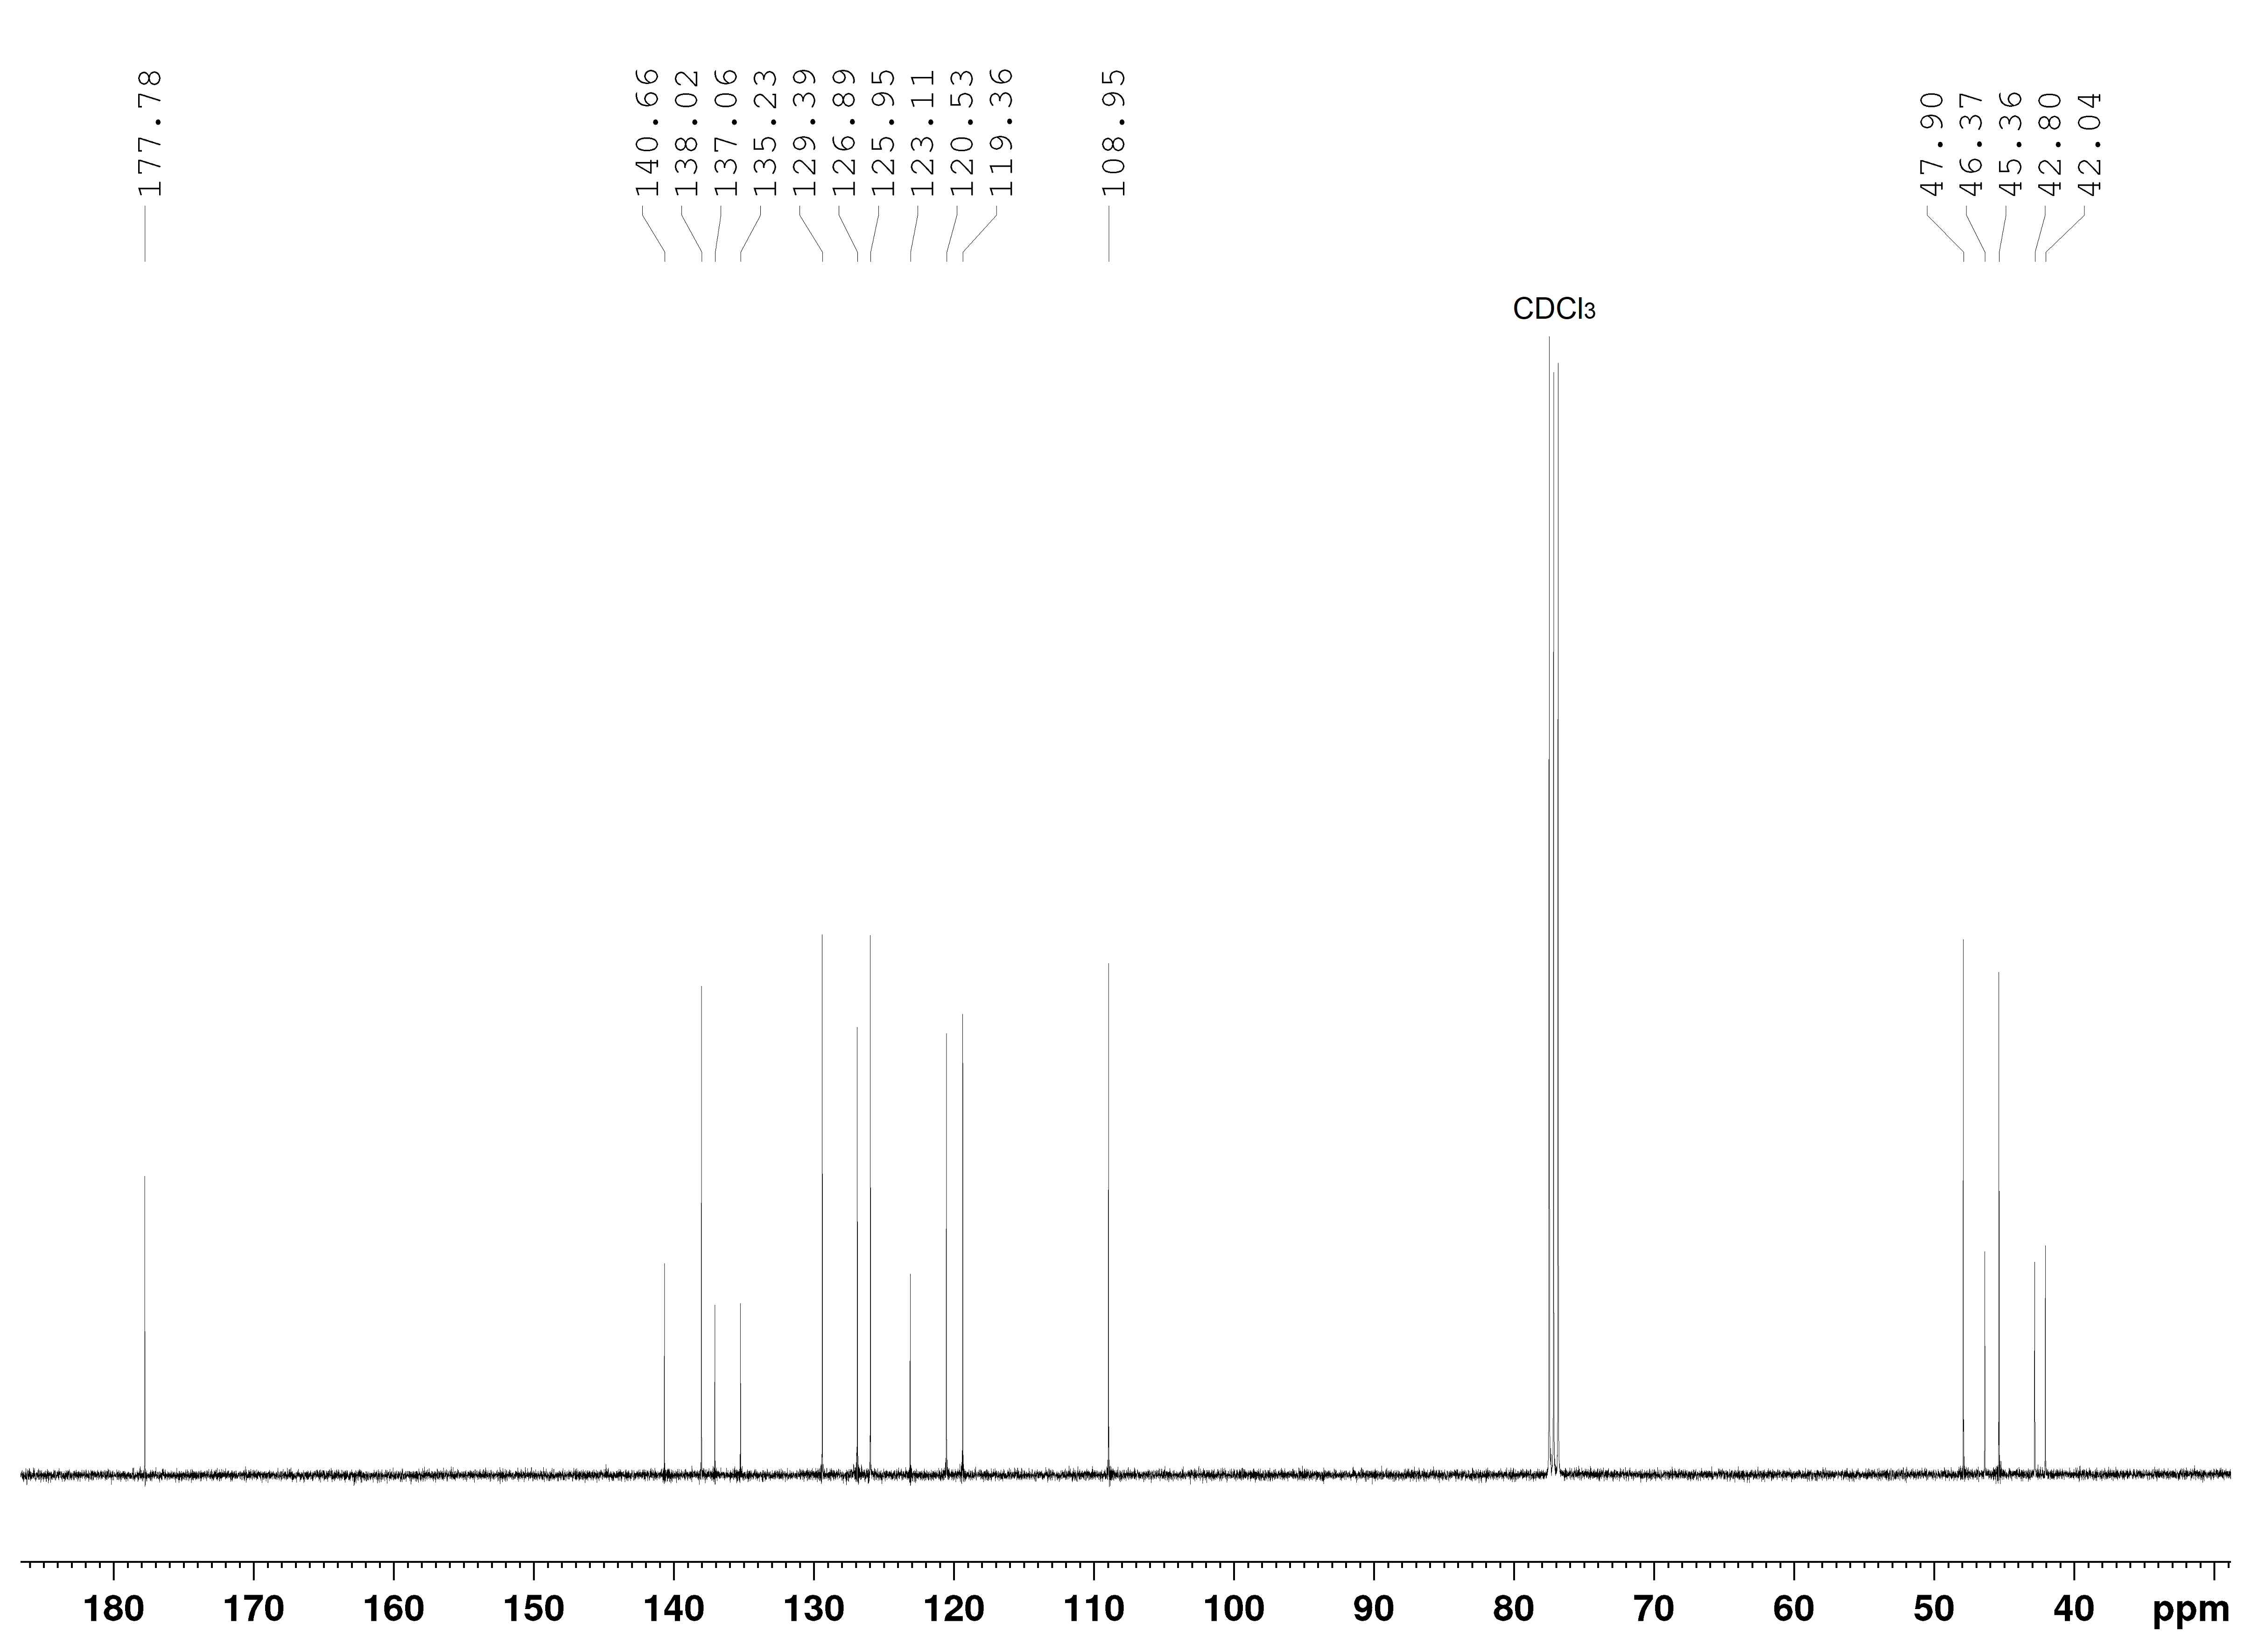


**Figure S2:** 13C NMR of 2-(4-((9H-carbazole-9-yl)methyl)benzyl)-3a,4,7,7a-tetrahydro-1H-4,7-methanoisoindole-1,3(2H)-dione (**M**). (Solvent: CDCl3, TMS scale)


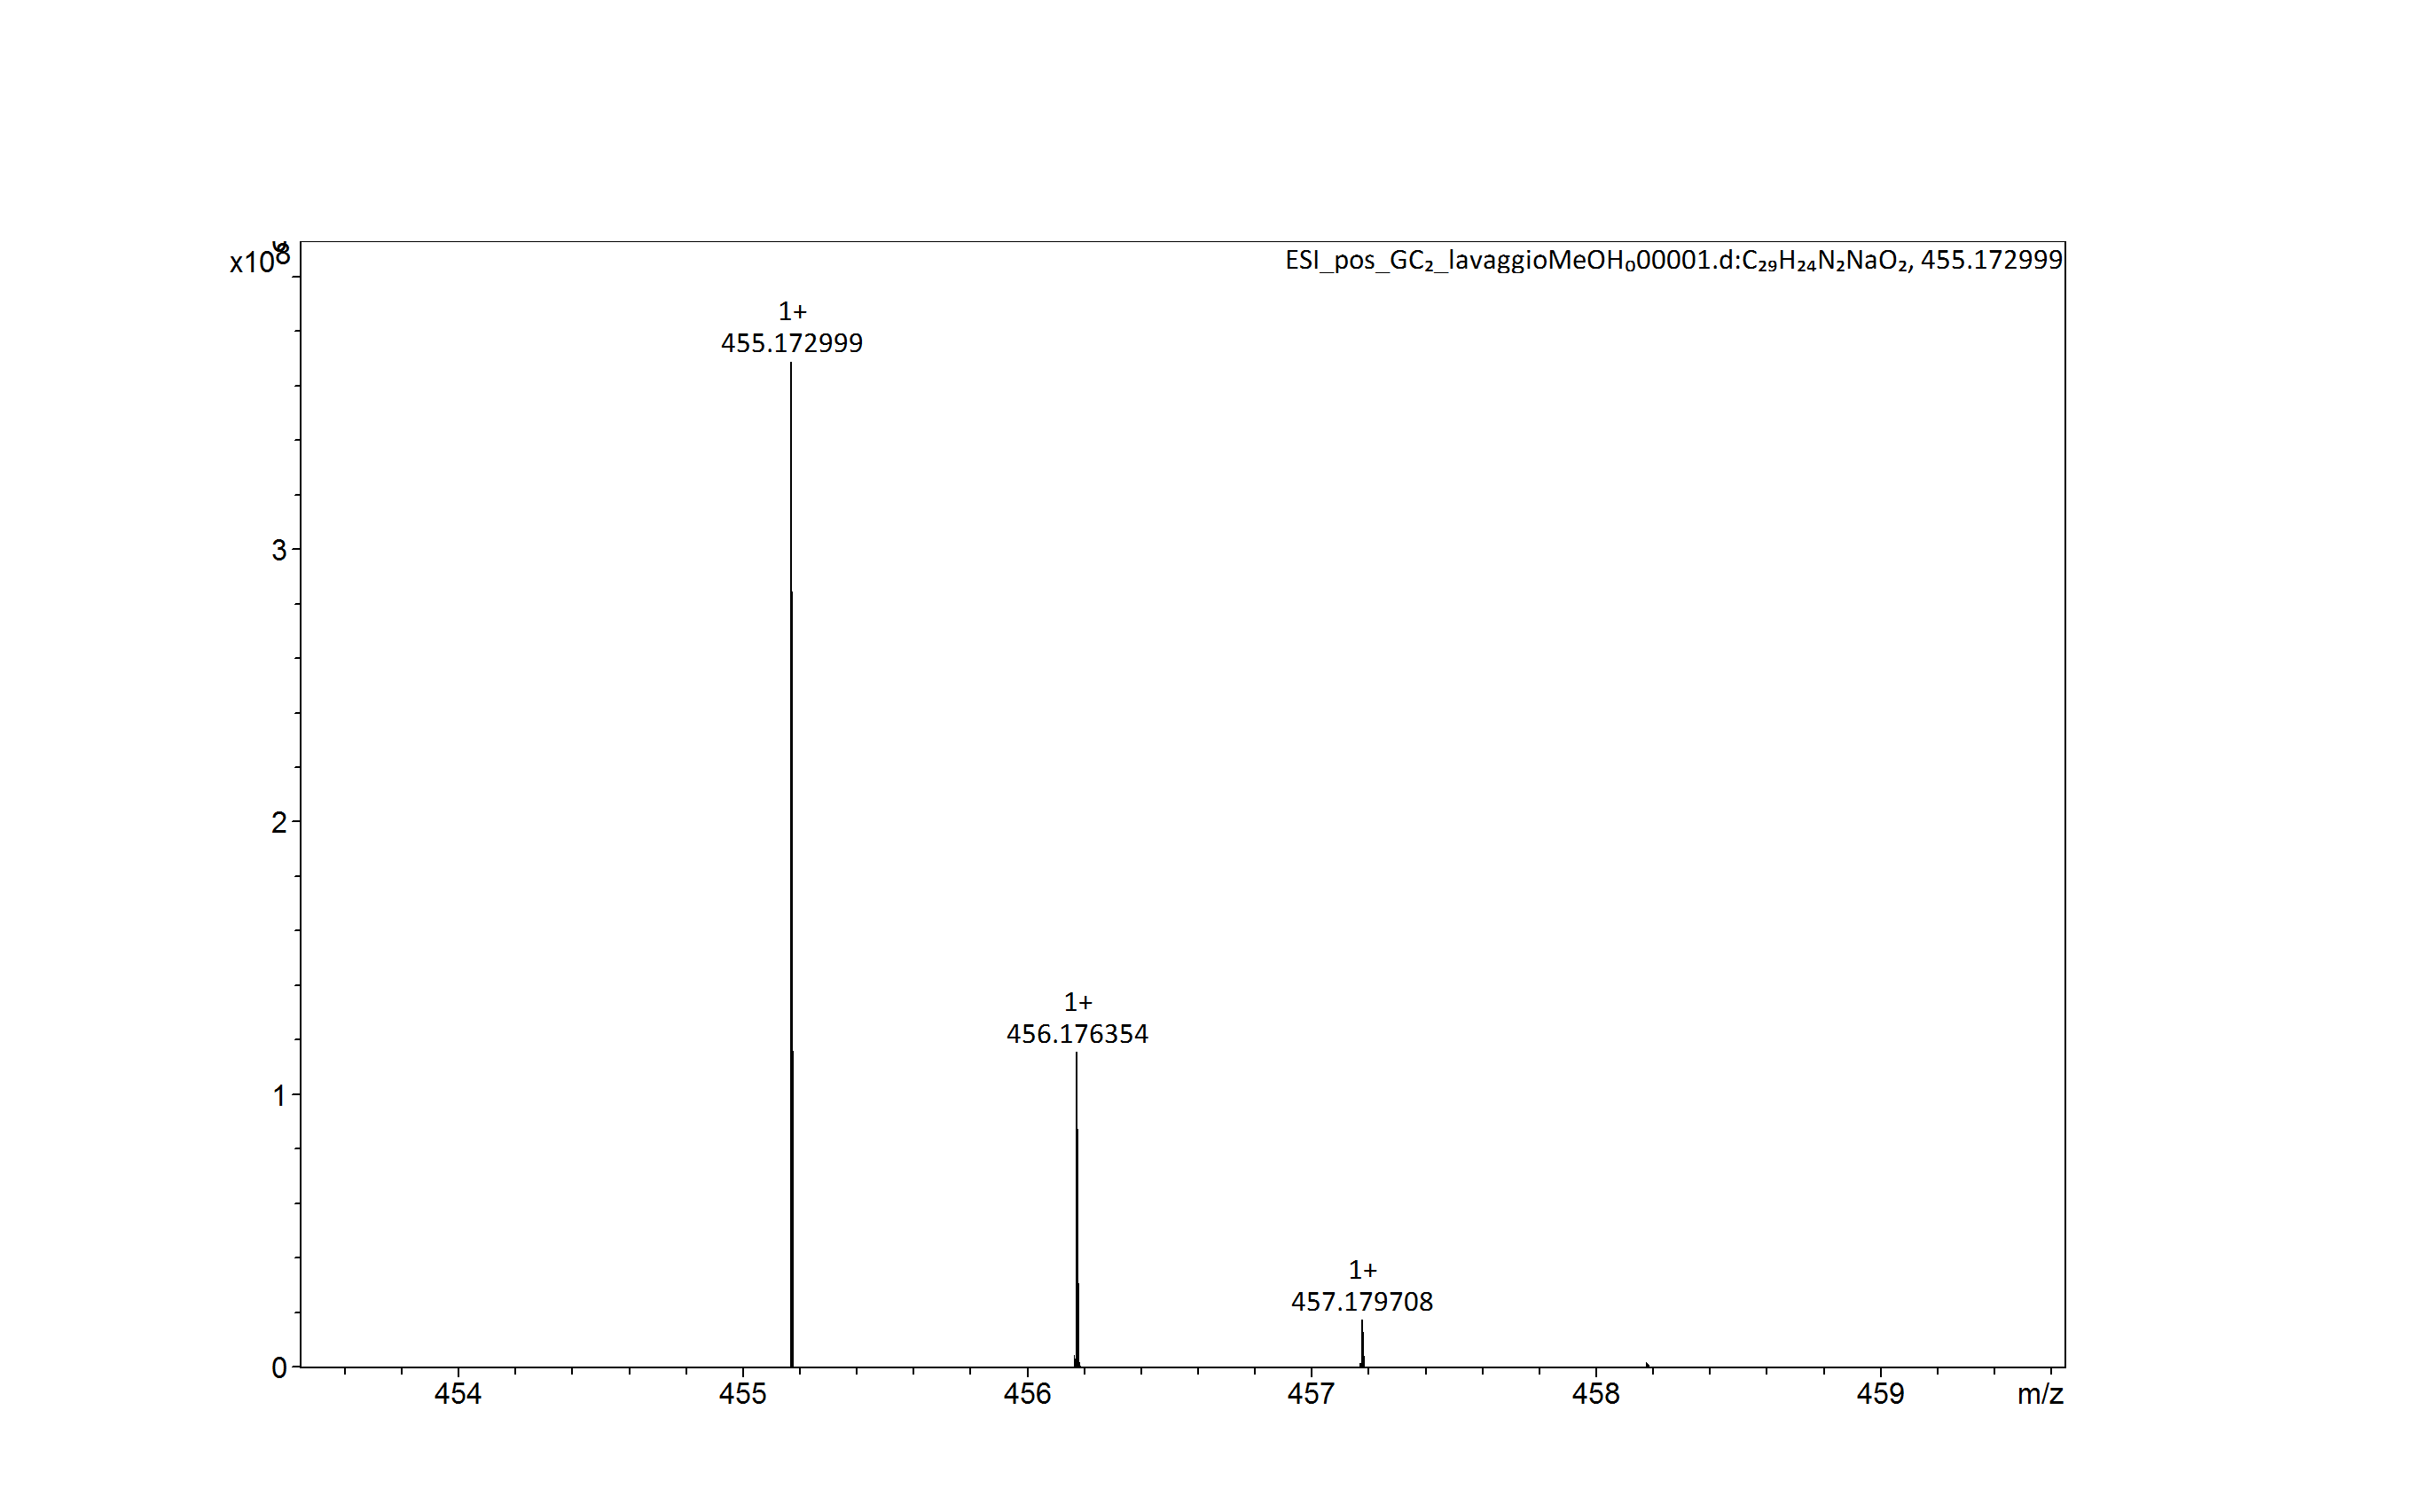


**Figure S3:** ESI-MS of 2-(4-((9H-carbazole-9-yl)methyl)

benzyl)-3a,4,7,7a-tetrahydro-1H-4,7-methanoisoindole-1,3(2H)-dione (**M**)


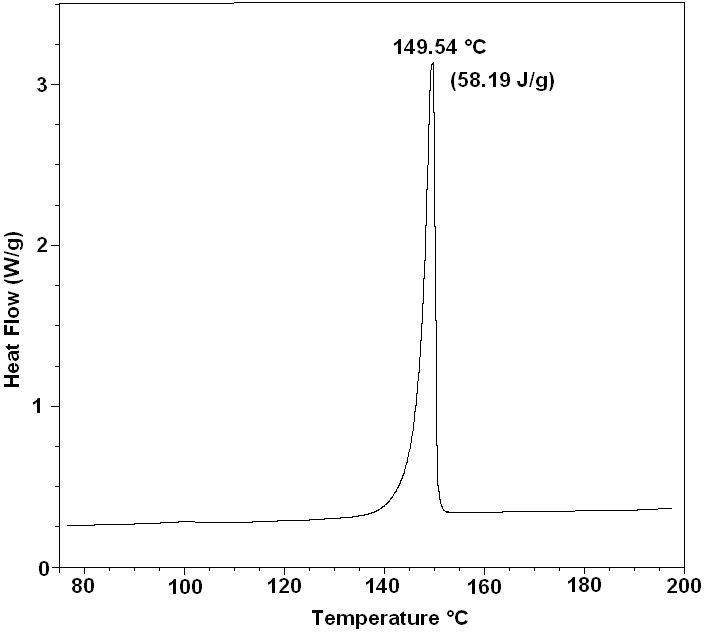


**Figure S4.** DSC thermogram trace of 2-(4-((9H-carbazole-9-yl)methyl)benzyl)-3a,4,7,7a-tetrahydro-1H-4,7-methanoisoindole-1,3(2H)-dione (**M**). (First heating run, 10 °C/min.)


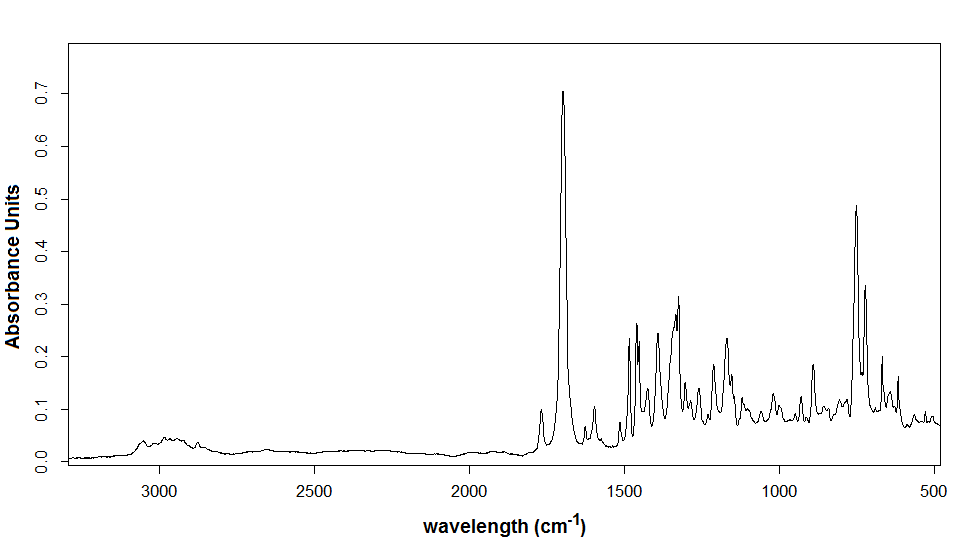


**Figure S5.** FT-IR spectrum of 2-(4-((9H-carbazole-9-yl)methyl)benzyl)-3a,4,7,7a-tetrahydro-1H-4,7-methanoisoindole-1,3(2H)-dione (**M**).


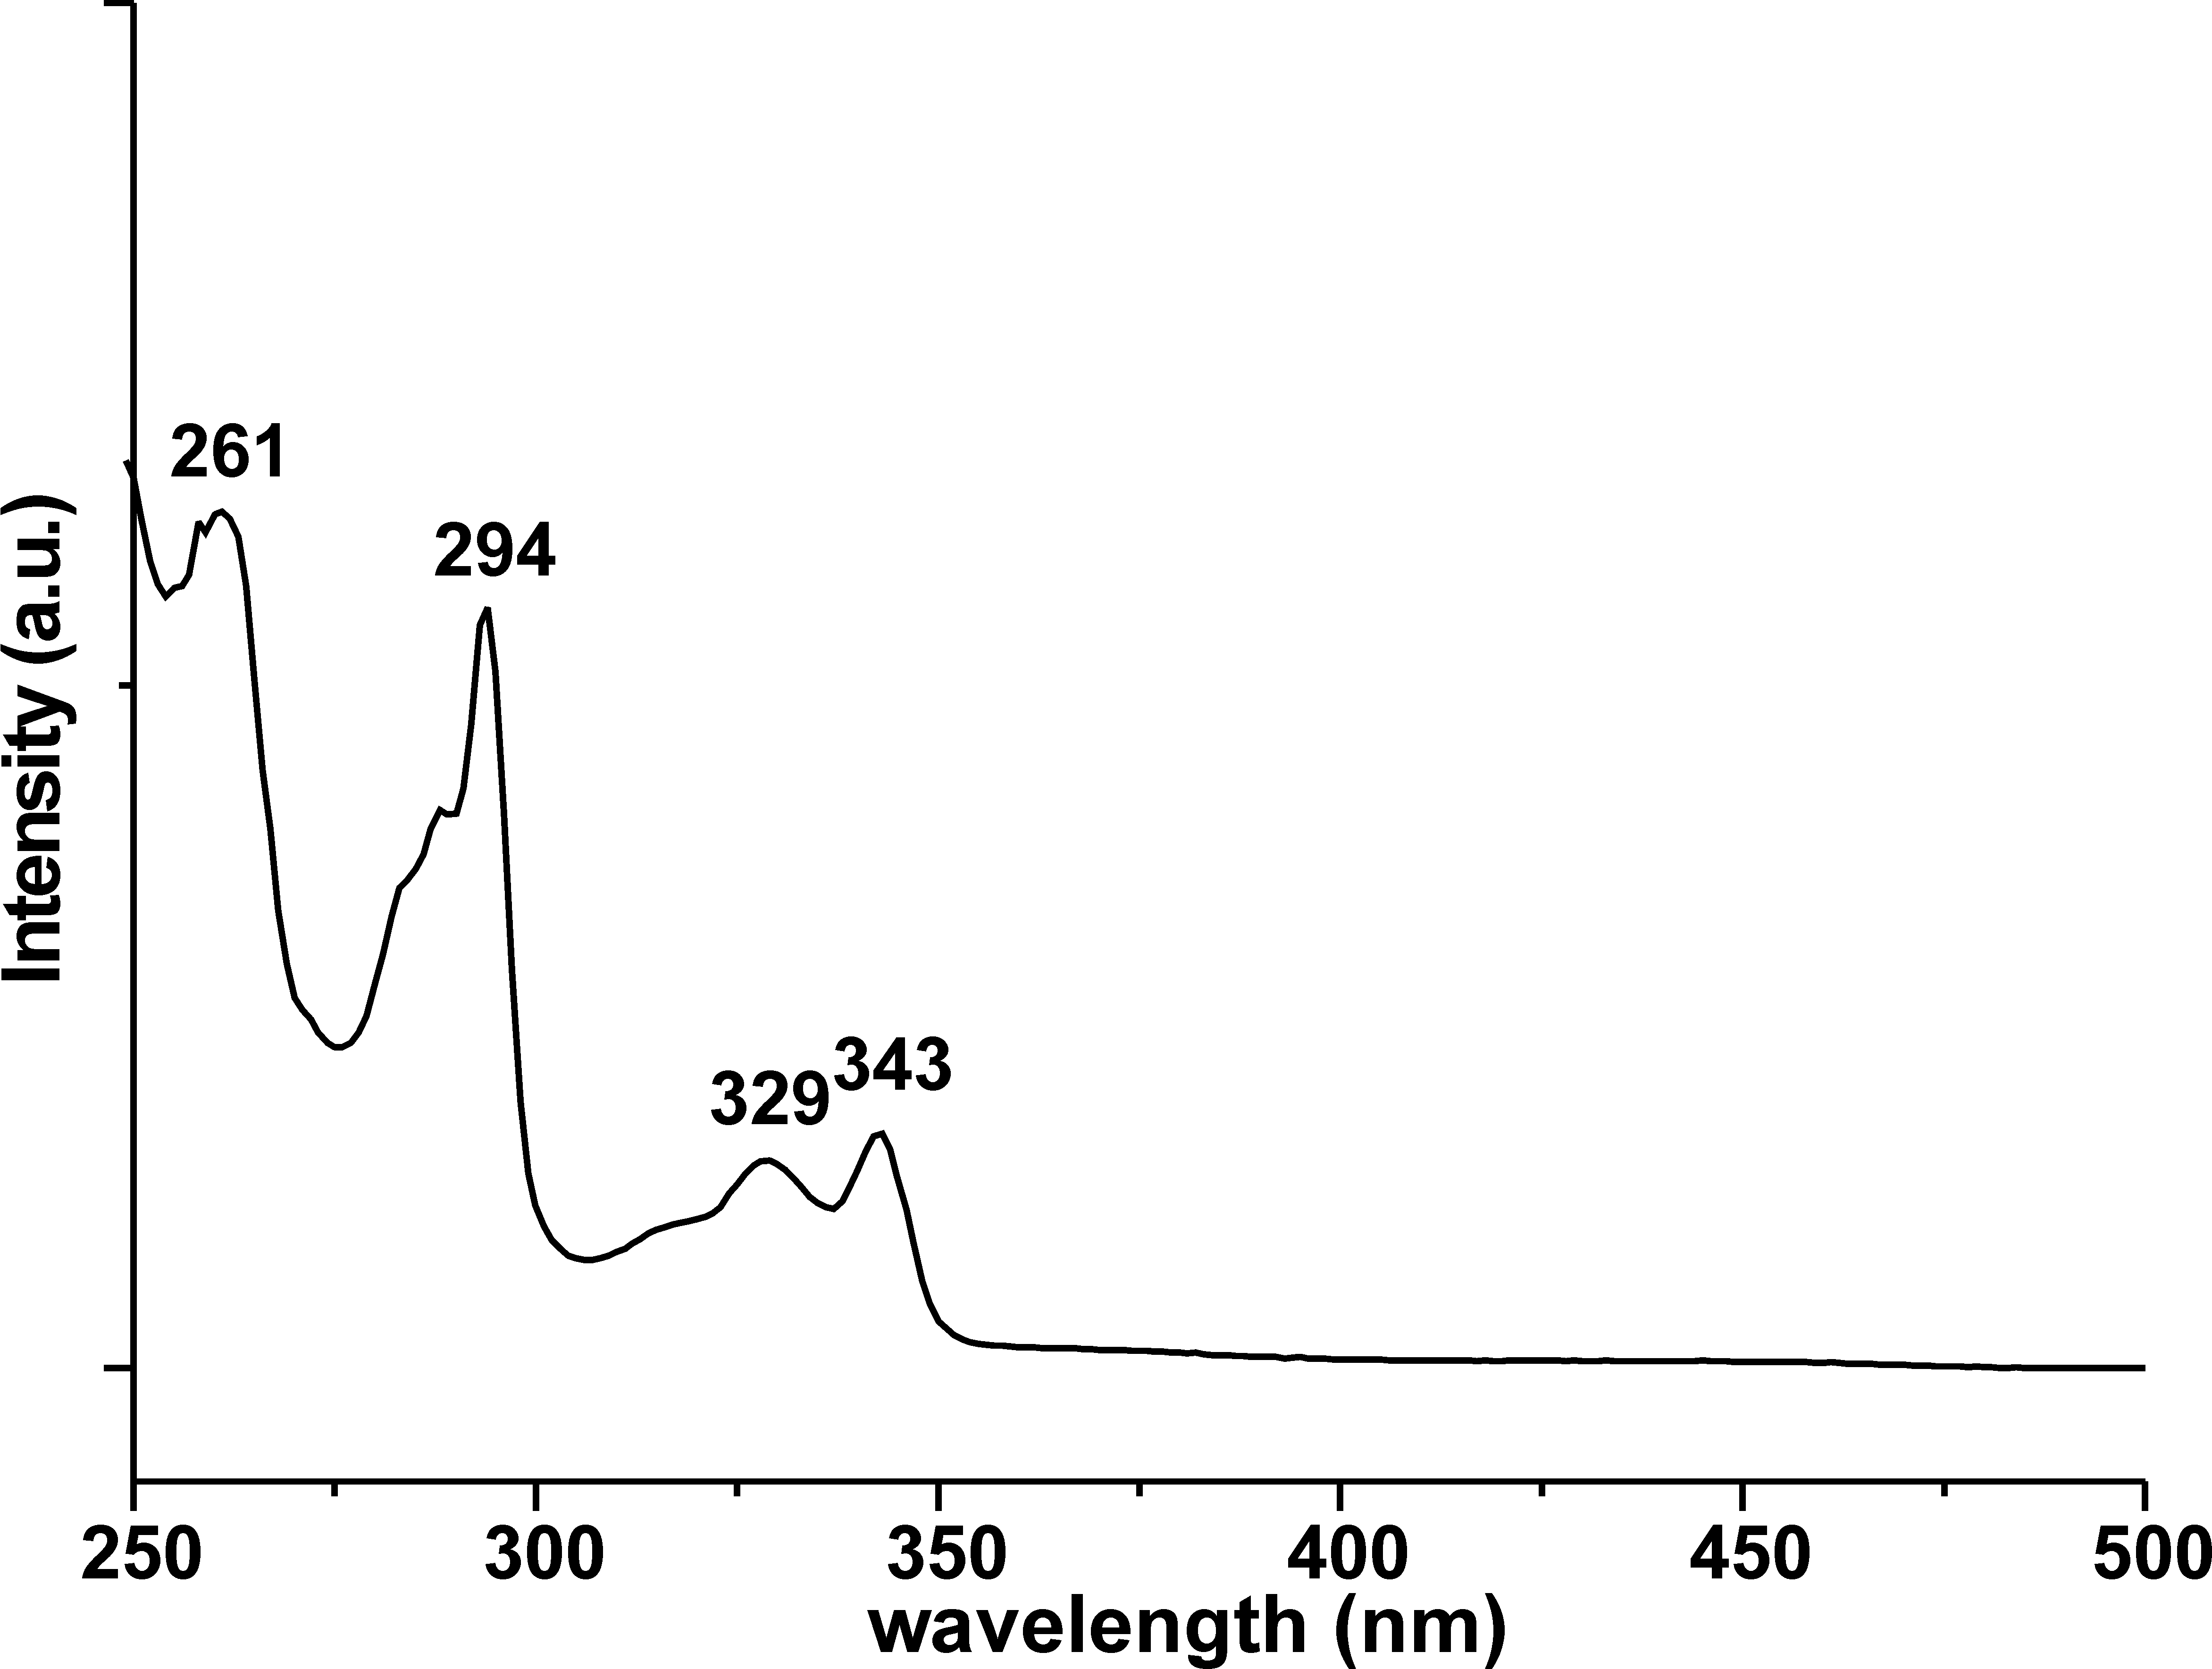


**Figure S6.** UV-vis absorption spectrum of 2-(4-((9H-carbazole-9-yl)methyl)benzyl)-3a,4,7,7a-tetrahydro-1H-4,7-methanoisoindole-1,3(2H)-dione (**M**) in THF solution (1x10-4 M).


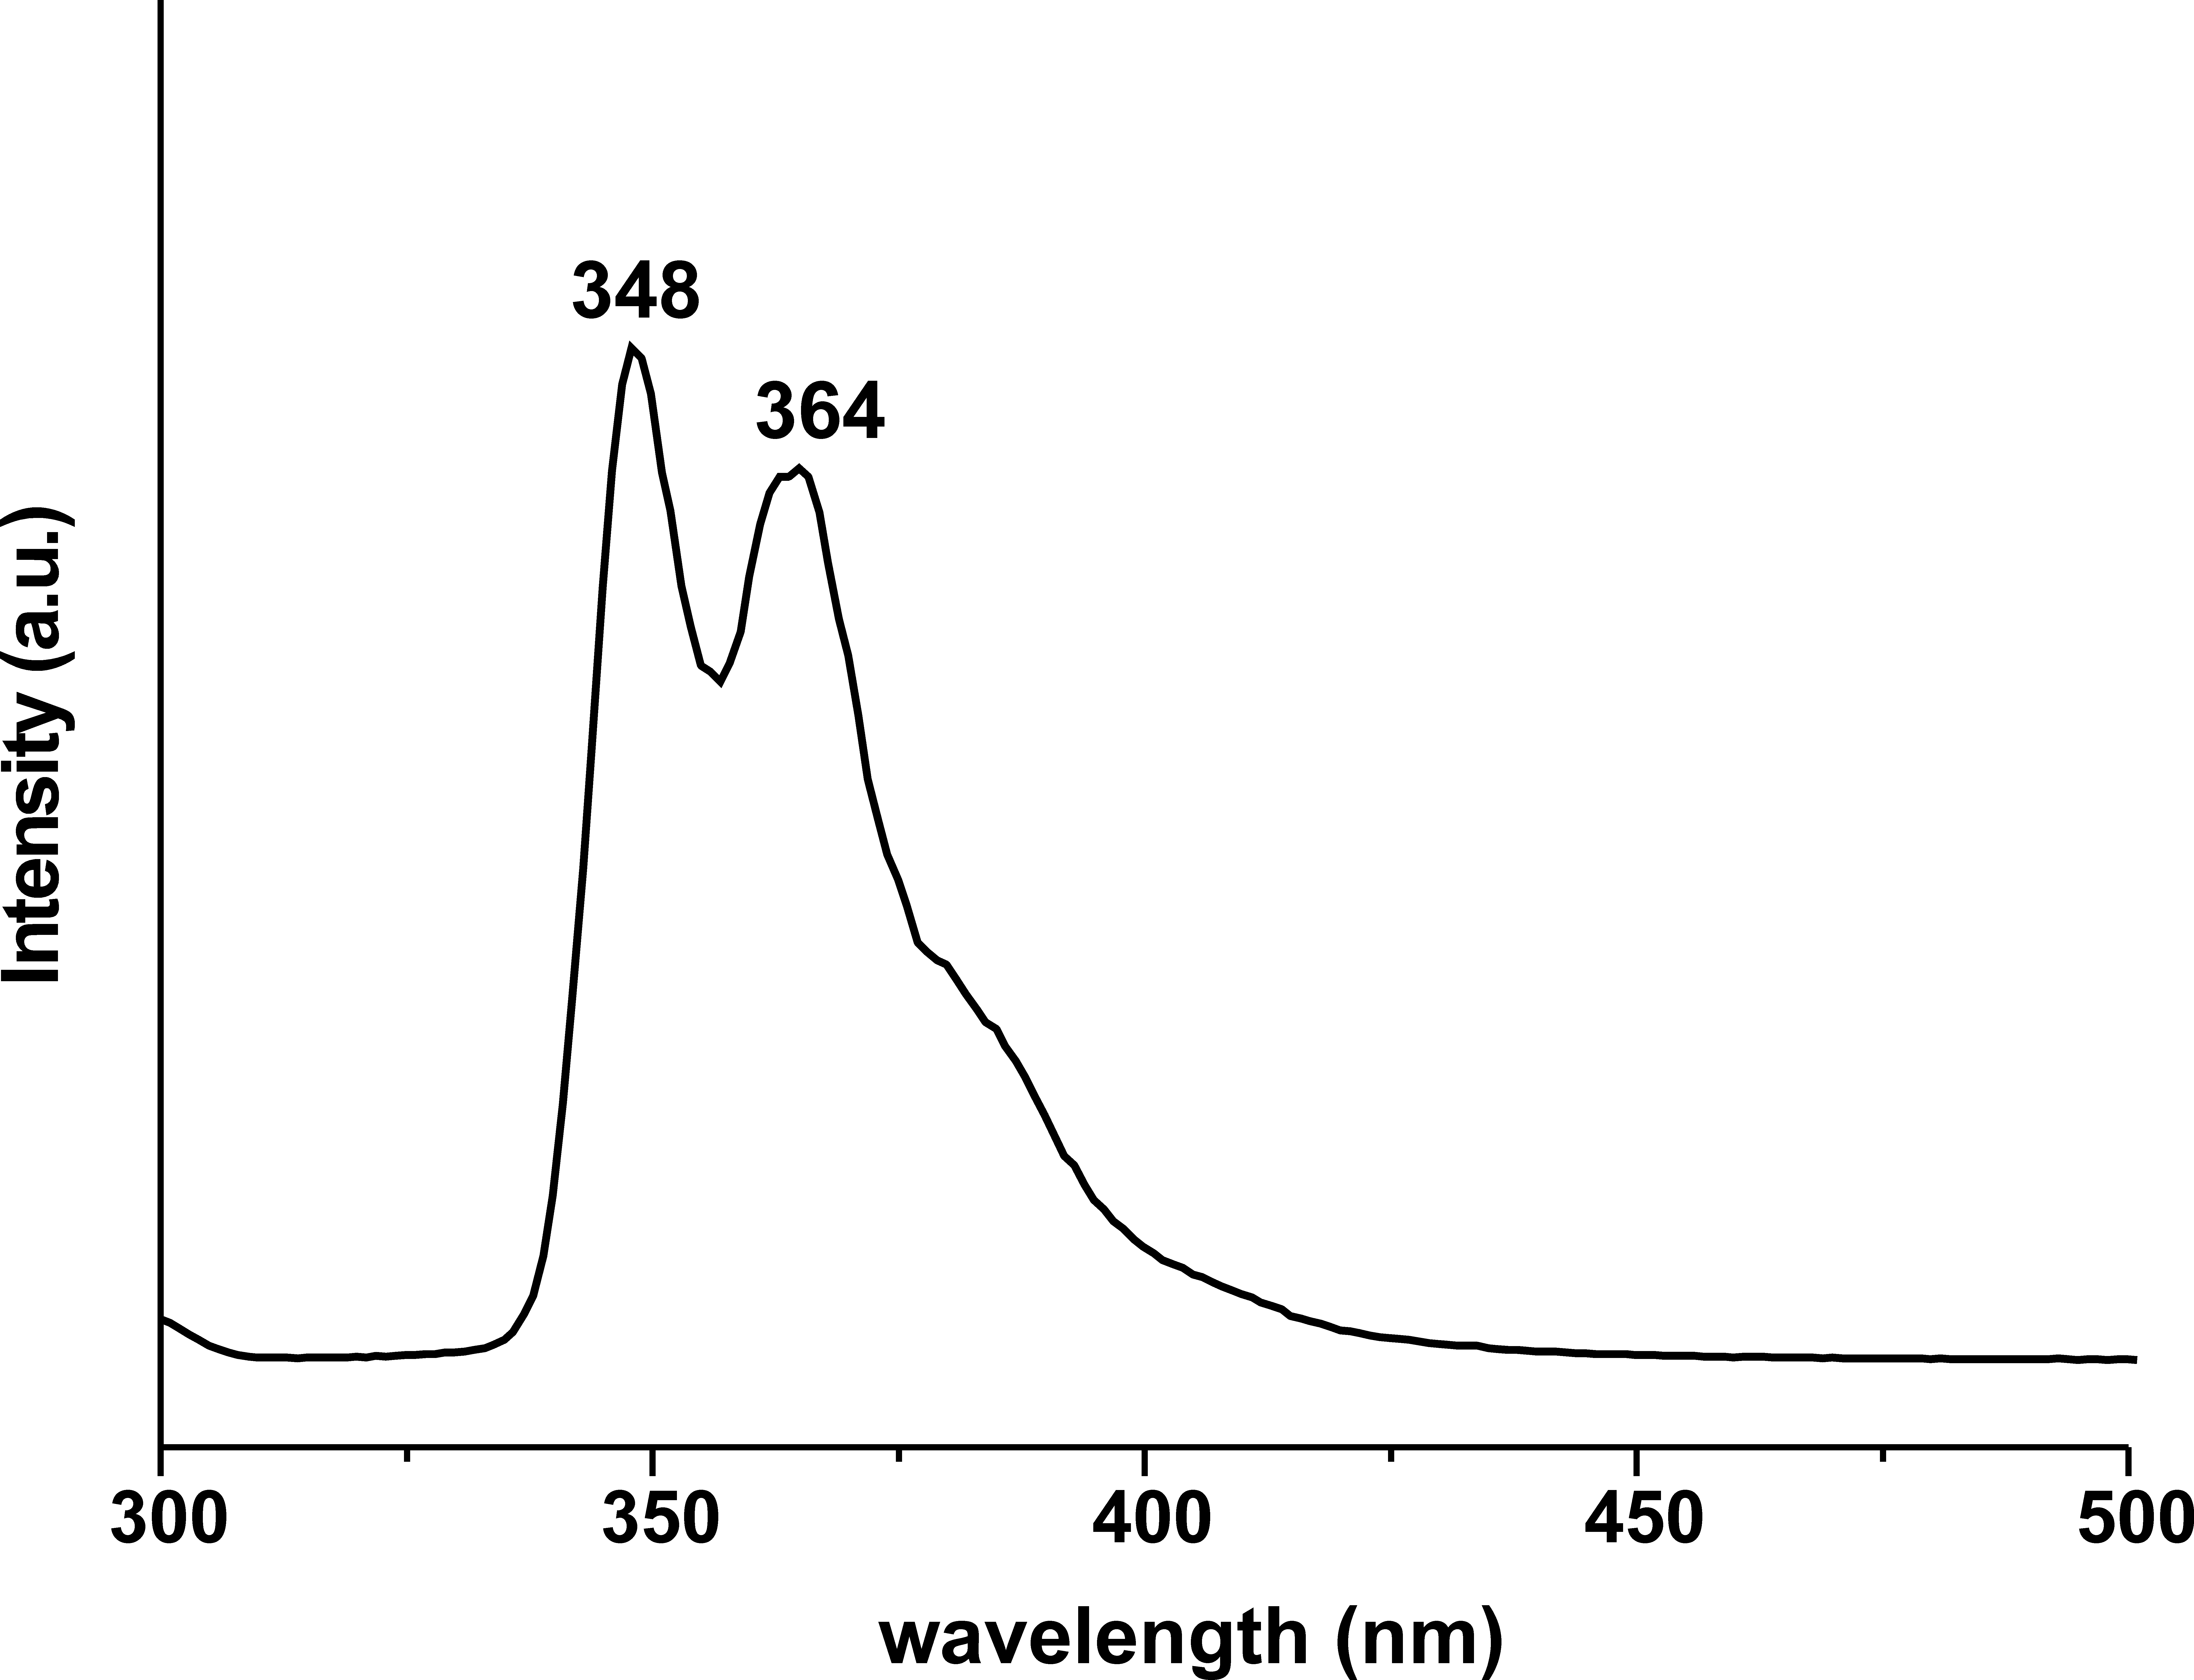


**Figure S7.** Fluorescence spectrum of 2-(4-((9H-carbazole-9-yl)methyl)benzyl)-3a,4,7,7a-tetrahydro-1H-4,7-methanoisoindole-1,3(2H)-dione (**M**) in THF solution (1x10-4 M).


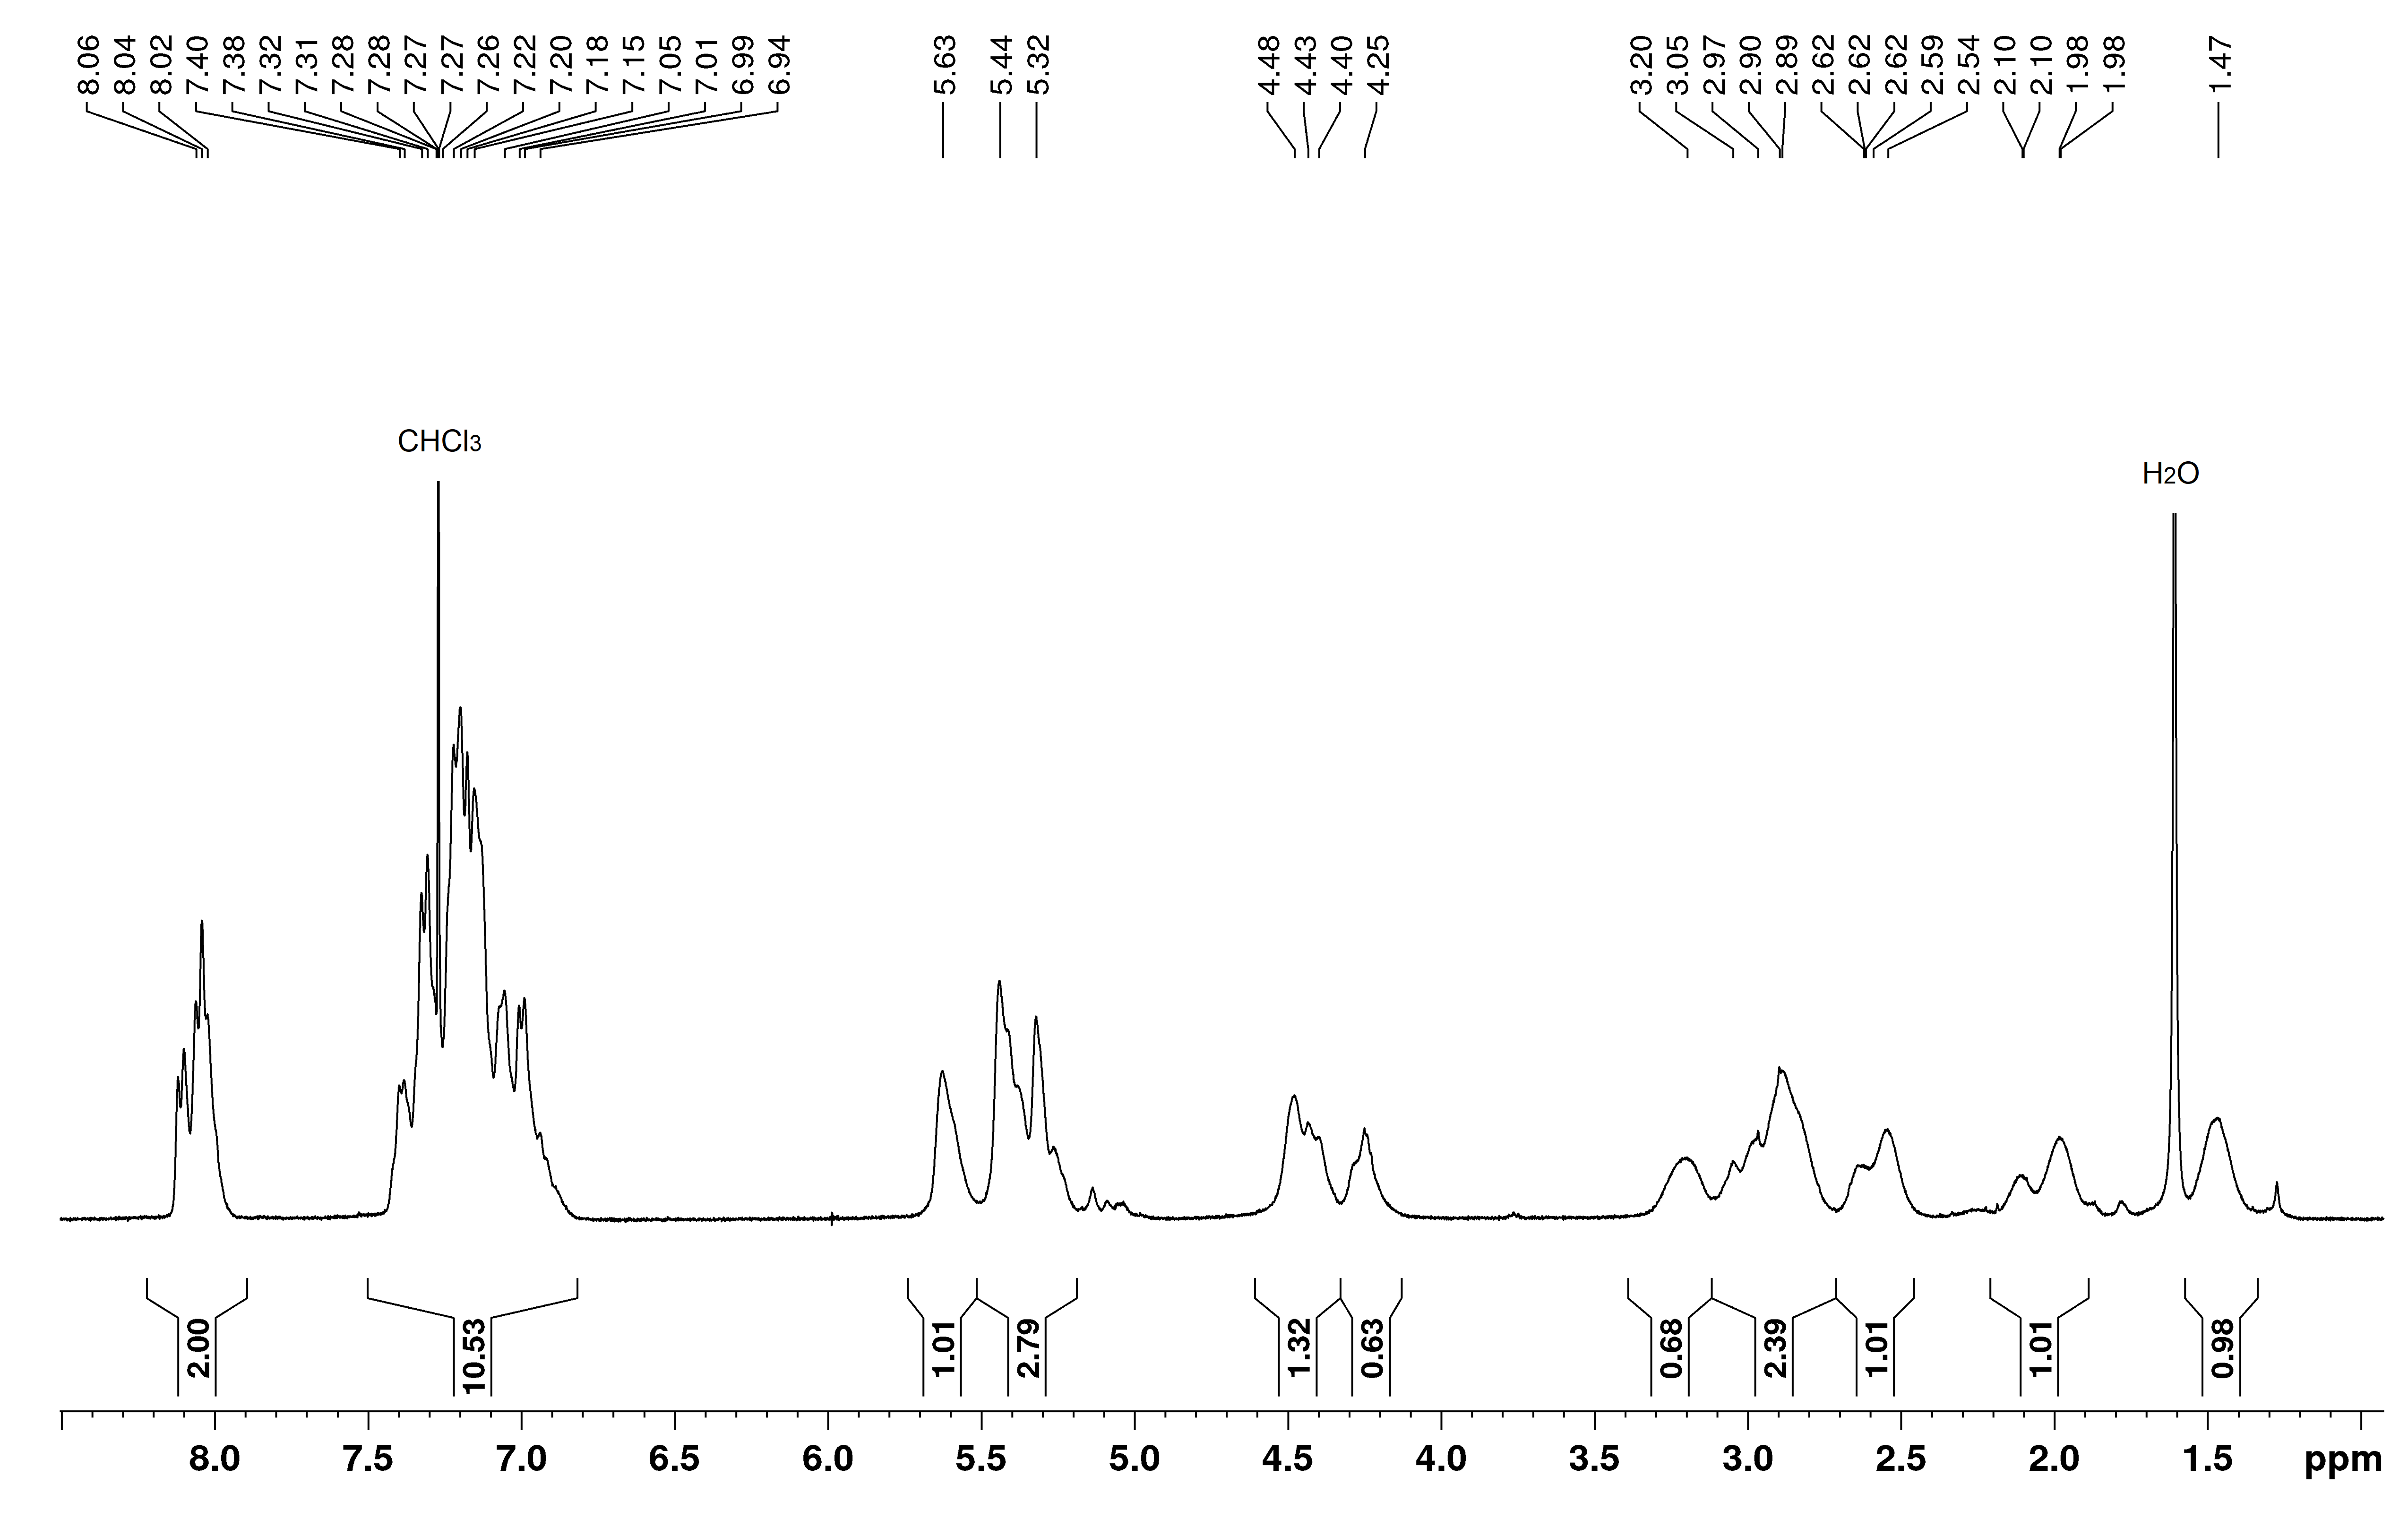


**Figure S8.** 1H NMR of poly(2-(4-((9H-carbazole-9-yl)methyl)benzyl)-3a,4,7,7a-tetrahydro-1H-4,7-methanoisoindole-1,3(2H)-dione (**M**). (Solvent: CDCl3, TMS scale)


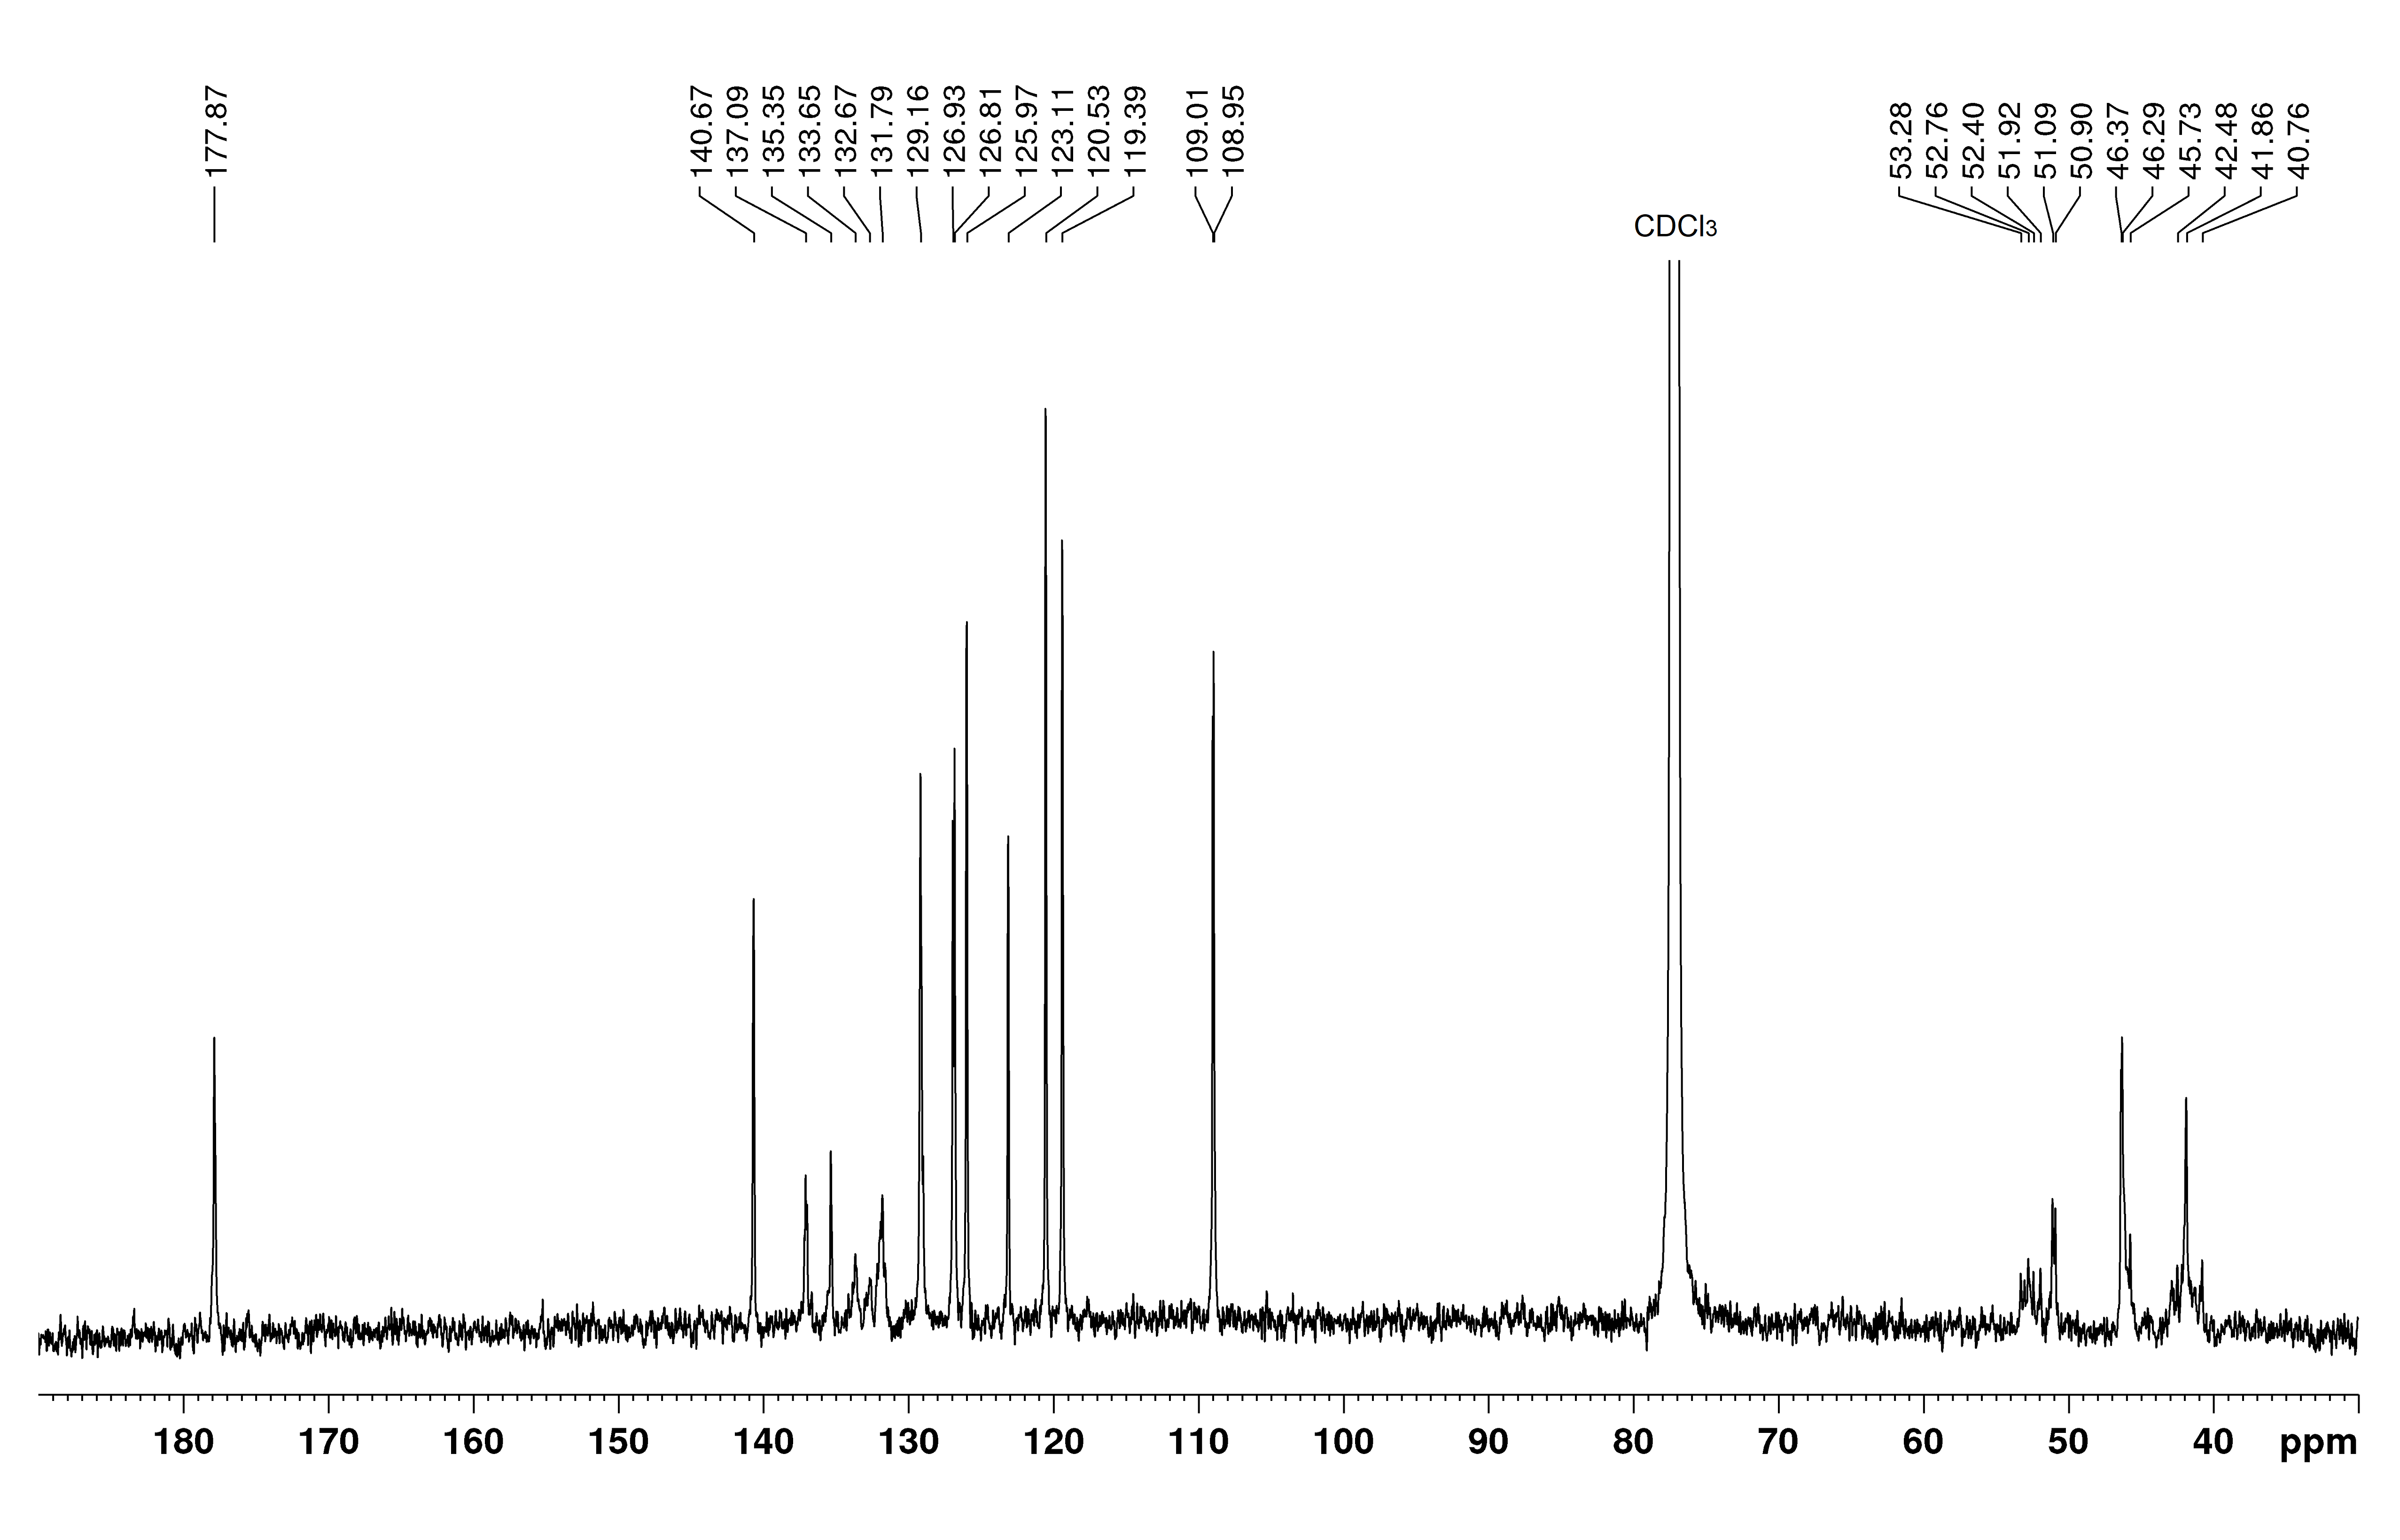


**Figure S9.** 13C NMR of poly(2-(4-((9H-carbazole-9-yl)methyl)benzyl)-3a,4,7,7a-tetrahydro-1H-4,7-methanoisoindole-1,3(2H)-dione. (Solvent: CDCl3, TMS scale)


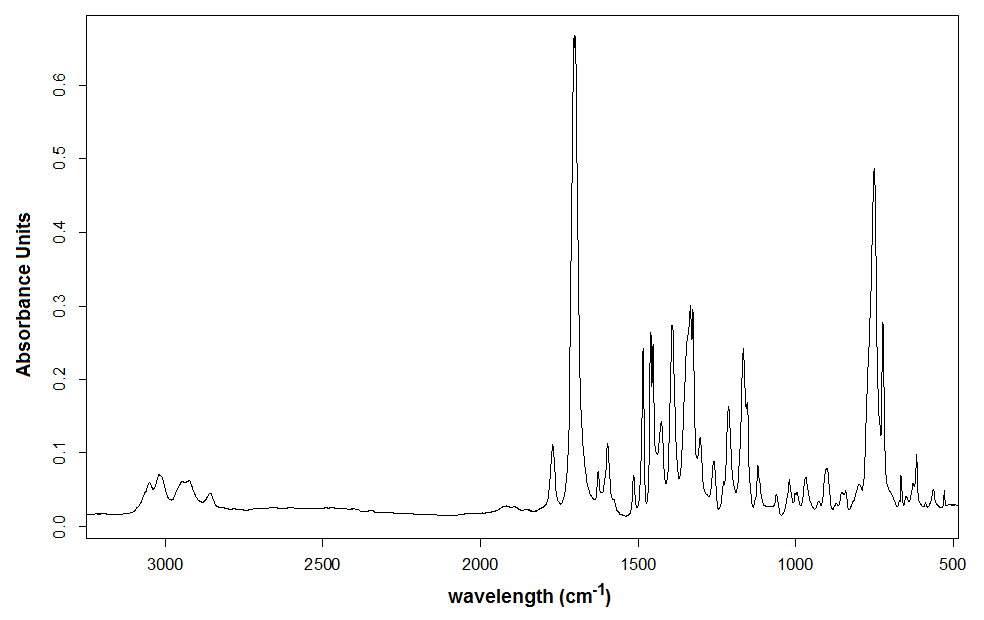


**Figure S10.** FT-IR spectrum of polymer sample **2**.


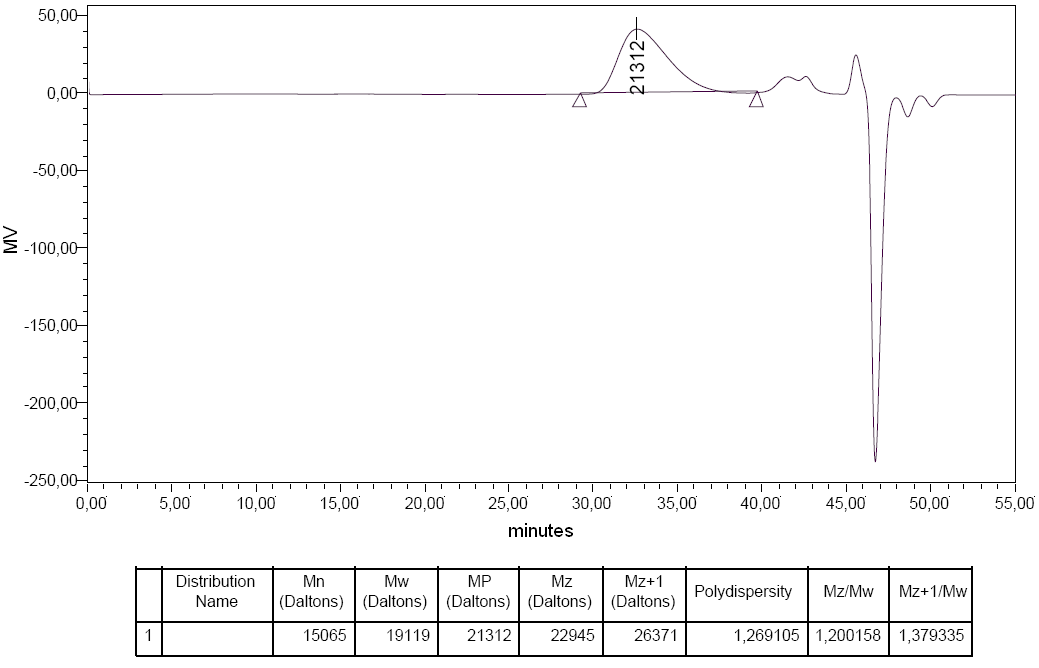


**Figure S11.** GPC trace of polymer sample **1.**
